# Supplementary material for: Improving Care Transitions for Hospitalized Veterans Discharged to Skilled Nursing Facilities: A Focus on Polypharmacy and Geriatric Syndromes
Source: Geriatrics (Basel). 2019 Feb 9;4(1):19. doi: 10.3390/geriatrics4010019 (PMC6473365; doi:10.3390/geriatrics4010019)
Supplement: Supplementary file 1 [file geriatrics-04-00019-s001.pdf]

# Improving Care Transitions for Hospitalized Veterans Discharged to Skilled Nursing Facilities: A Focus on Polypharmacy and Geriatric Syndromes

Amanda S. Mixon<sup>1,2,3,4,\*</sup>, Vivian M. Yeh<sup>3</sup>, Sandra Simmons<sup>2,3,4,5</sup>, James Powers<sup>2,4,5</sup>, Eugene Wesley Ely<sup>2,4</sup>, John Schnelle<sup>2,3,4,5</sup> and Eduard E. Vasilevskis<sup>1,2,3,4</sup>

<sup>1</sup> Section of Hospital Medicine, Vanderbilt University Medical Center, Nashville, TN 37203, USA; ed.vasilevskis@vumc.org

<sup>2</sup> Geriatric Research Education and Clinical Center (GRECC), VA Tennessee Valley Healthcare System, Nashville, TN 37212, USA; sandra.simmons@vumc.org (S.S.); james.powers@vumc.org (J.P.); wes.ely@vumc.org (E.W.E.); john.schnelle@Vanderbilt.Edu (J.S.)

<sup>3</sup> Center for Clinical Quality and Implementation Research, Vanderbilt University Medical Center, Nashville, TN 37203, USA; vivian.m.yeh@vumc.org

<sup>4</sup> Center for Quality Aging, Vanderbilt University Medical Center, Nashville, TN 37203, USA

<sup>5</sup> Division of Geriatrics, Vanderbilt University Medical Center, Nashville, TN 37232, USA

\* Correspondence: Amanda.S.Mixon@vumc.org; Tel.: +1-615-936-3710

Received: 30 December 2018; Accepted: 5 February 2019; Published: 9 February 2019

## Supplementary Materials:

### 1. Selected assessments

Incontinence assessment

Date of assessment MM/DD/YYYY

Bladder 0, Continent

1, Incontinent

2, Not applicable

If 'not applicable' was selected, please elaborate. [free text]

Source of bladder information? 1, Chart

2, Nurse

3, Other

If 'other', please indicate source. [free text]

Bowel 0, Continent

1, Incontinent

2, Not applicable

[illegible]

Questions to ask patient and/or family:

- If 'yes,' which?
- 1, Bladder
- 2, Bowel
- 3, Both

d. Do you want to be assisted to the toilet by a nurse every 2-3 hours? Y/N

Does the patient spontaneously request pain medication on his/her own, if needed?

- Nurse available to answer incontinence questions? Y/N

Please select the source for the information contained above (check all that apply):

- 1, Patient
- 2, Family
- 3, Medical record
- 4, Nurse/other provider

Nutrition assessment

Date of assessment MM/DD/YYYY

Is there at least one weight recorded in the chart? Y/N

Weight 1: Most recent chart weight (in pounds)

Weight 1 date MM/DD/YYYY

(other weights up to 5 are included)

Any comments regarding weights [free text]

Source of information:

- 1, Patient
- 2, Other (family, caregiver, etc.)
- 3, Both patient and family/caregiver

What does patient/family report for current weight? [free text]

Weight loss prior to hospitalization: Has the patient lost weight without trying to within the last month prior to being admitted to the hospital? 1, Yes

- 2, No
- 3, Do not know

If 'yes,' how much? If he/she does not know the amount, type "DK" in the box. [free text]

Weight loss during hospitalization: Has the patient lost weight during this hospital stay?

- 1, Yes
- 2, No
- 3, Do not know

If 'yes,' how much? If he/she does not know the amount, type "DK" in the box. [free text]

Appetite: Have you noticed any change in your/your relative's appetite since being admitted to the hospital?

- 1, Yes, Decrease in appetite - eating less than normal
- 2, No change in appetite - eating about the same as normal

3, Yes, Increase in appetite - eating more

Does patient/family think they need either verbal prompting or physical assistance to eat?

1, Verbal prompting/encouragement

2, Physical assistance

3, No assistance required

4, N/A (feeding tube)

Do you have any concerns about your/your relative's eating habits or weight? Y/N

If 'yes,' what are your concerns? [free text]

Is there anything else you would like to share with me about your/your relative's eating habits or weight? [free text]

Would this patient be a good candidate for observation of meal intake? Y/N

If 'yes,' why (e.g., low weight, discrepancy between chart documentation of weight and/or intake and patient/family report, etc.) [free text]

**Figure S1** Nursing Transition Summary (NuTs)

| Medical record #: _____                                                                                                                                                               |                                                                                                                                                              | DOB: _____                                                                                                                                                                            |                       |
|---------------------------------------------------------------------------------------------------------------------------------------------------------------------------------------|--------------------------------------------------------------------------------------------------------------------------------------------------------------|---------------------------------------------------------------------------------------------------------------------------------------------------------------------------------------|-----------------------|
| <b>Patient Information</b>                                                                                                                                                            |                                                                                                                                                              | <b>Vital Signs (as of: _____)</b>                                                                                                                                                     |                       |
| Gender: <input type="checkbox"/> Male <input type="checkbox"/> Female                                                                                                                 |                                                                                                                                                              | HT: _____                                                                                                                                                                             | BP: _____             |
| Admit date: _____                                                                                                                                                                     | Discharge date: _____                                                                                                                                        | WT: _____                                                                                                                                                                             | Temp: _____           |
| Admit service: _____                                                                                                                                                                  | D/C Service: _____                                                                                                                                           | Date: _____                                                                                                                                                                           |                       |
| Admit diagnosis: _____                                                                                                                                                                | Other diagnoses: _____                                                                                                                                       | HR: _____                                                                                                                                                                             | RR: _____ SpO2: _____ |
| Vaccination information: Flu<br><input type="checkbox"/> Yes; Date: _____<br><input type="checkbox"/> Declined <input type="checkbox"/> Not documented                                | Vaccination information: Pneumonia<br><input type="checkbox"/> Yes; Date: _____<br><input type="checkbox"/> Declined <input type="checkbox"/> Not documented | <b>Hospital Course/Treatment</b>                                                                                                                                                      |                       |
| PAC Facility: <input type="text" value="Select..."/>                                                                                                                                  | Reason for PAC transfer: <input type="text" value="Select..."/>                                                                                              |                                                                                                                                                                                       |                       |
| If 'other,' please specify: _____                                                                                                                                                     | If 'other,' please specify: _____                                                                                                                            |                                                                                                                                                                                       |                       |
| Hospital contact<br>Physician/nurse name: _____<br>Phone number: _____                                                                                                                | Outpatient contact<br>PCP name: _____<br>Phone number: _____                                                                                                 | Significant exam findings: _____                                                                                                                                                      |                       |
| <b>Advance Care Planning</b>                                                                                                                                                          |                                                                                                                                                              |                                                                                                                                                                                       |                       |
| Advance directive: <input type="checkbox"/> Yes <input type="checkbox"/> No                                                                                                           |                                                                                                                                                              | Can patient respond to simple interview questions?<br><input type="checkbox"/> Yes <input type="checkbox"/> No                                                                        |                       |
| A. <input type="checkbox"/> CPR <input type="checkbox"/> DNR/no CPR                                                                                                                   |                                                                                                                                                              | Family/Caregiver contact: _____                                                                                                                                                       |                       |
| B. Medical Interventions<br><input type="checkbox"/> Comfort Measures<br><input type="checkbox"/> Limited Additional Interventions<br><input type="checkbox"/> Full Treatment         |                                                                                                                                                              | Relationship: _____<br>Phone: _____                                                                                                                                                   |                       |
| C. <input type="checkbox"/> Antibiotics <input type="checkbox"/> No Antibiotics                                                                                                       |                                                                                                                                                              | Does this person serve as a legal designated health care decision maker (i.e., DPOAHC, HC Agent)? <input type="checkbox"/> Yes <input type="checkbox"/> No                            |                       |
| D. Fluids and Nutrition<br><input type="checkbox"/> IV Fluids <input type="checkbox"/> No IV Fluids<br><input type="checkbox"/> Feeding Tube <input type="checkbox"/> No feeding tube |                                                                                                                                                              | Number of discussions: <input type="text" value="Select..."/><br>Does patient have a completed POST form? <input type="checkbox"/> Yes <input type="checkbox"/> No<br>Comments: _____ |                       |

| Cognitive and Mental Status |                                                                                                                                                                                                                                                                                                                                                                                                                                                                                                                                                                                | Issues to consider                             |
|-----------------------------|--------------------------------------------------------------------------------------------------------------------------------------------------------------------------------------------------------------------------------------------------------------------------------------------------------------------------------------------------------------------------------------------------------------------------------------------------------------------------------------------------------------------------------------------------------------------------------|------------------------------------------------|
| Dementia                    | Does this patient have a dementia diagnosis? <input type="checkbox"/> Yes <input type="checkbox"/> No                                                                                                                                                                                                                                                                                                                                                                                                                                                                          |                                                |
| Delirium                    | Delirium at any point during hospital stay: <input type="checkbox"/> Yes <input type="checkbox"/> No<br>Onset/Duration: <input type="text"/><br>Treatment/Response to treatment: <input type="text"/><br>Delirium on discharge: <input type="checkbox"/> Yes <input type="checkbox"/> No                                                                                                                                                                                                                                                                                       |                                                |
| Cognitive Status            | Was there a change in cognitive status during acute care stay? <input type="checkbox"/> Yes <input type="checkbox"/> No<br>BIMS score: <input type="text"/><br>If 'yes,' please describe: <input type="text"/>                                                                                                                                                                                                                                                                                                                                                                 |                                                |
| Mental Status               | Mental Status: <input type="text" value="Select..."/><br>Mental Health: <input type="checkbox"/> Depression <input type="checkbox"/> Anxiety<br>Depression Assessment (e.g., symptoms endorsed, etc.): <input type="text"/><br>Treatment/Response to treatment: <input type="text"/>                                                                                                                                                                                                                                                                                           |                                                |
| Functional Status           |                                                                                                                                                                                                                                                                                                                                                                                                                                                                                                                                                                                | Issues to consider                             |
| Ambulation                  | Ambulation at discharge: <input type="text" value="Select..."/><br>Devices: <input type="text"/><br>Does this constitute a change in ambulation from admission or prior to admission? <input type="checkbox"/> Yes <input type="checkbox"/> No<br>If 'yes,' please describe change in ambulation: <input type="text"/>                                                                                                                                                                                                                                                         |                                                |
| Transfers                   | Transfer (including toileting): <input type="text" value="Select..."/><br>Devices: <input type="text"/>                                                                                                                                                                                                                                                                                                                                                                                                                                                                        |                                                |
| Weight bearing status       | Left: <input type="text" value="Select..."/><br>Right: <input type="text" value="Select..."/><br>Additional information regarding weight bearing status: <input type="text"/>                                                                                                                                                                                                                                                                                                                                                                                                  |                                                |
| Fall risk                   | Is patient a fall risk? <input type="checkbox"/> Yes <input type="checkbox"/> No<br>Additional information (including restraints used, recent falls, etc.): <input type="text"/>                                                                                                                                                                                                                                                                                                                                                                                               |                                                |
| Bowel                       | <input type="checkbox"/> Continent<br><input type="checkbox"/> Constipated <input type="checkbox"/> Incontinent<br>Last BM: <input type="text" value=""/><br>If 'incontinent' or 'constipated,' additional information: <input type="text"/>                                                                                                                                                                                                                                                                                                                                   |                                                |
| Bladder                     | <input type="checkbox"/> Continent<br><input type="checkbox"/> Incontinent <input type="checkbox"/> N/A (catheter)<br>Voiding frequency during last day in acute care: <input type="text"/><br>Source: <input type="text" value="Select..."/><br>If incontinent, please select: <input type="text" value="Select..."/><br>Additional information/instructions: <input type="text"/>                                                                                                                                                                                            |                                                |
| Catheter                    | Did patient have a Foley Catheter during hospitalization: <input type="checkbox"/> Yes <input type="checkbox"/> No<br>Date placed: <input type="text" value=""/><br>Reason: <input type="text"/><br>Complications: <input type="text"/><br>Date removed: <input type="text" value=""/> <input type="checkbox"/> N/A<br>Did patient void after f/c removed: <input type="checkbox"/> Yes <input type="checkbox"/> No<br>Instructions: <input type="checkbox"/> Do not remove<br><input type="checkbox"/> Change monthly<br><input type="checkbox"/> Other: <input type="text"/> |                                                |
| Nutrition                   |                                                                                                                                                                                                                                                                                                                                                                                                                                                                                                                                                                                | Issues to consider                             |
| Tube feeding                | Was patient discharged with a feeding tube? <input type="checkbox"/> Yes <input type="checkbox"/> No<br>If 'yes,' type: <input type="text"/><br>If tube feeding, insertion date: <input type="text" value=""/>                                                                                                                                                                                                                                                                                                                                                                 | Instructions/supplements: <input type="text"/> |
| Oral food/fluid intake      | Speech/swallow eval? <input type="checkbox"/> Yes <input type="checkbox"/> No If 'yes,' significant findings: <input type="text"/><br>Feeding assistance required: <input type="text" value="Select..."/><br>Estimate of intake on last day in acute care: <input type="text" value="Select..."/><br>Instructions/supplements if intake is below 50%: <input type="text"/>                                                                                                                                                                                                     | Diet: <input type="text"/>                     |

| Nursing                |                                                                                                                                                                                                                                                                                                                                                                                                                                                                      | Issues to consider                      |
|------------------------|----------------------------------------------------------------------------------------------------------------------------------------------------------------------------------------------------------------------------------------------------------------------------------------------------------------------------------------------------------------------------------------------------------------------------------------------------------------------|-----------------------------------------|
| Pain                   | Range of pain during course of hospitalization: <input type="text"/><br>Pain level on discharge (between 0-10): <input type="text" value="Select..."/><br>Worst pain in past 5 days: <input type="text" value="Select..."/><br>Location(s) of pain: <input type="text"/><br>Treatment/response to treatment (including # of PRN dosages in last 24 hrs): <input type="text"/><br>Additional comments regarding pain (Trend, PT/OT notes, etc.): <input type="text"/> |                                         |
| Allergies              | <input type="checkbox"/> NKDA                                                                                                                                                                                                                                                                                                                                                                                                                                        | List: <input type="text"/>              |
| IV access              | IV access: <input type="text" value="Select..."/>                                                                                                                                                                                                                                                                                                                                                                                                                    | <input type="text"/>                    |
| Devices                | <input type="checkbox"/> Colostomy<br><input type="checkbox"/> Urostomy<br><input type="checkbox"/> Pacemaker/ICD<br>Additional information: <input type="text"/>                                                                                                                                                                                                                                                                                                    | <input type="text"/>                    |
| Respiratory            | Respiratory: <input type="text" value="Select..."/><br>If 'oxygen,' please select: <input type="checkbox"/> PRN <input type="checkbox"/> Continuous    LPM: <input type="text"/><br>Does patient require: <input type="checkbox"/> CPAP <input type="checkbox"/> BiPAP <input type="checkbox"/> None<br>Settings: <input type="text"/>                                                                                                                               | <input type="text"/>                    |
| Infection control      | Infection control: <input type="text" value="Select..."/><br>If 'other,' please specify: <input type="text"/>                                                                                                                                                                                                                                                                                                                                                        | Type of isolation: <input type="text"/> |
| Skin Care              |                                                                                                                                                                                                                                                                                                                                                                                                                                                                      | Issues to consider                      |
| Skin                   | Does patient have pressure ulcers, surgical wounds, vascular, rash, or other skin issue: <input type="checkbox"/> Yes <input type="checkbox"/> No<br>If 'yes,' please describe: <input type="text"/><br>Does patient require a wound vac? <input type="checkbox"/> Yes <input type="checkbox"/> No<br>Braden score: <input type="text"/>                                                                                                                             | Wound care: <input type="text"/>        |
| Other                  |                                                                                                                                                                                                                                                                                                                                                                                                                                                                      | Issues to consider                      |
| PAC Stay               | Did a provider in the hospital have a discussion regarding PAC? <input type="checkbox"/> Yes <input type="checkbox"/> No<br>If 'yes,' regarding what:<br><input type="checkbox"/> Symptom management<br><input type="checkbox"/> PAC resources<br><input type="checkbox"/> Other: <input type="text"/><br>If 'yes,' please describe: <input type="text"/>                                                                                                            | <input type="text"/>                    |
| Equipment needed       | <input type="text"/>                                                                                                                                                                                                                                                                                                                                                                                                                                                 | <input type="text"/>                    |
| Labs and X-rays        | Labs/X-rays needed:<br>Does patient have any labs/X-rays pending: <input type="checkbox"/> Yes <input type="checkbox"/> No<br>If 'yes,' please describe how to obtain results: <input type="text"/>                                                                                                                                                                                                                                                                  | <input type="text"/>                    |
| Vision and Hearing     | Vision: <input type="checkbox"/> Normal <input type="checkbox"/> Impaired <input type="checkbox"/> Blind<br>Hearing: <input type="checkbox"/> Normal <input type="checkbox"/> Impaired <input type="checkbox"/> Deaf <input type="checkbox"/> Hearing Aid: <input type="text" value="Select..."/><br>Personal items: <input type="checkbox"/> Eyeglasses <input type="checkbox"/> Dentures <input type="checkbox"/> Other: <input type="text"/>                      | <input type="text"/>                    |
| Inpatient Consults     | <input type="text"/>                                                                                                                                                                                                                                                                                                                                                                                                                                                 |                                         |
| Education provided     | <input type="text"/>                                                                                                                                                                                                                                                                                                                                                                                                                                                 |                                         |
| Follow-up appointments | <input type="text"/>                                                                                                                                                                                                                                                                                                                                                                                                                                                 |                                         |
| Prepared By:           | This report was prepared by: <input type="text" value="Select..."/><br>Prepared: <input type="text"/>                                                                                                                                                                                                                                                                                                                                                                | Pager number: <input type="text"/>      |
| Highlights             | Here are 1-3 issues that are most important regarding the care of this patient:<br><input type="text"/>                                                                                                                                                                                                                                                                                                                                                              |                                         |

**Figure S2.** Medication Management Form.

**Reconciled Medication List for:** [Click here to enter text.](#)

**Last 4 of SSN:** [Click here to enter text.](#)

**Allergies:**

**Completed by:** \_\_\_\_\_

**Contact number:** \_\_\_\_\_

**Updated:** [Click here to enter a date.](#)

| Pre-Hospital Medications | Action | Hospital Discharge Medications to Be Given at Post-Acute Care | Indication | Comments | Last dose |
|--------------------------|--------|---------------------------------------------------------------|------------|----------|-----------|
|                          |        |                                                               |            |          |           |
|                          |        |                                                               |            |          |           |
|                          |        |                                                               |            |          |           |
|                          |        |                                                               |            |          |           |
|                          |        |                                                               |            |          |           |
|                          |        |                                                               |            |          |           |
|                          |        |                                                               |            |          |           |
|                          |        |                                                               |            |          |           |
|                          |        |                                                               |            |          |           |
|                          |        |                                                               |            |          |           |
|                          |        |                                                               |            |          |           |

**Blood glucose/Insulin**

On day of hospital discharge:

|                           | Breakfast | Lunch | Dinner | Bedtime |
|---------------------------|-----------|-------|--------|---------|
| Blood glucose (mg/dL)     |           |       |        |         |
| Insulin scheduled (units) |           |       |        |         |
| Insulin prn (units)       |           |       |        |         |

On day prior to hospital discharge:

|                           | Breakfast | Lunch | Dinner | Bedtime |
|---------------------------|-----------|-------|--------|---------|
| Blood glucose (mg/dL)     |           |       |        |         |
| Insulin scheduled (units) |           |       |        |         |
| Insulin prn (units)       |           |       |        |         |

**CHF Diuretics**

Target (Dry) weight:

Instructions on daily weights:

|                      | 2 days prior to discharge | Day prior to discharge | Day of discharge |
|----------------------|---------------------------|------------------------|------------------|
| Creatinine           |                           |                        |                  |
| Weight (lbs)         |                           |                        |                  |
| Furosemide dose (mg) |                           |                        |                  |

**Anticoagulation:**

- **Indication:**                      **Goal:**                      **Duration:**
- **Regimen:** Initiated on MM/DD/YY
  - Warfarin XXmg at bedtime
- **Recent INR:**
- **Other Labs:** Hgb XX, Hct XX, Platelet XX (MM/DD/YY)

**Time invested:**
